# Supplementary material
Source: Springer Nature journal article supplement (https://www.springermedizin.de/resource/supplementary/12894_2011_199_MOESM1_ESM.pdf/9513266)

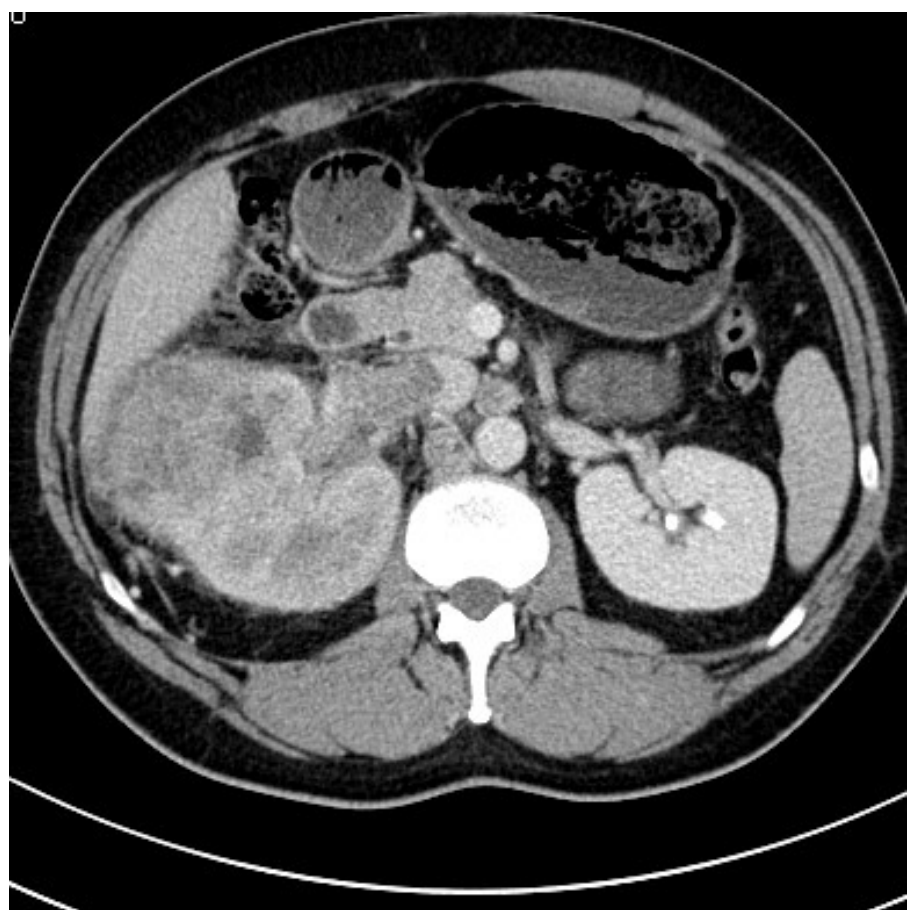

Supplement: MOESM1 [file 9513266]
